# Supplementary material for: Effect of differentiating exercise guidance based on a patient’s level of low back pain in primary care: a mixed-methods systematic review protocol
Source: PubMed Central journal article supplement — BMJ Open. 2018 Jan 23;8(1):e019742. doi: 10.1136/bmjopen-2017-019742 (PMC5988063; doi:10.1136/bmjopen-2017-019742), 2018-01-23
Supplement: bmjopen-2017-019742.draft_revisions.pdf [file bmjopen-2017-019742.draft_revisions.pdf]

# BMJ Open

BMJ Open is committed to open peer review. As part of this commitment we make the peer review history of every article we publish publicly available.

When an article is published we post the peer reviewers' comments and the authors' responses online. We also post the versions of the paper that were used during peer review. These are the versions that the peer review comments apply to.

The versions of the paper that follow are the versions that were submitted during the peer review process. They are not the versions of record or the final published versions. They should not be cited or distributed as the published version of this manuscript.

BMJ Open is an open access journal and the full, final, typeset and author-corrected version of record of the manuscript is available on our site with no access controls, subscription charges or pay-per-view fees (<http://bmjopen.bmj.com>).

If you have any questions on BMJ Open's open peer review process please email [editorial.bmjopen@bmj.com](mailto:editorial.bmjopen@bmj.com)

# BMJ Open

## Exercise therapy based on the level of low back pain of patients in primary care: a systematic review protocol

|                                 |                                                                                                                                                                                                                                                                                                                                                               |
|---------------------------------|---------------------------------------------------------------------------------------------------------------------------------------------------------------------------------------------------------------------------------------------------------------------------------------------------------------------------------------------------------------|
| Journal:                        | <i>BMJ Open</i>                                                                                                                                                                                                                                                                                                                                               |
| Manuscript ID                   | bmjopen-2017-019742                                                                                                                                                                                                                                                                                                                                           |
| Article Type:                   | Protocol                                                                                                                                                                                                                                                                                                                                                      |
| Date Submitted by the Author:   | 22-Sep-2017                                                                                                                                                                                                                                                                                                                                                   |
| Complete List of Authors:       | Jorgensen, Jens; Aalborg University, Research Unit for General Practice in Aalborg, Department of Clinical Medicine;<br>Afzali, Tamana; Aalborg University, Research Unit for General Practice in Aalborg, Department of Clinical Medicine<br>Riis, Allan; Aalborg University, Research Unit for General Practice in Aalborg, Department of Clinical Medicine |
| <b>Primary Subject Heading</b>: | General practice / Family practice                                                                                                                                                                                                                                                                                                                            |
| Secondary Subject Heading:      | Rheumatology, Medical education and training                                                                                                                                                                                                                                                                                                                  |
| Keywords:                       | low back pain, exercise therapy, PRIMARY CARE, PAIN MANAGEMENT                                                                                                                                                                                                                                                                                                |
|                                 |                                                                                                                                                                                                                                                                                                                                                               |

SCHOLARONE™  
Manuscripts

1  
2  
3  
4  
5  
6  
7 **Exercise therapy based on the level of low back pain of patients in primary care: a systematic**  
8 **review protocol**  
9

10  
11 Jens Erik Jorgensen, Tamana Afzali, Allan Riis

12 Research Unit for General Practice in Aalborg, Department of Clinical Medicine, Aalborg  
13 University, Denmark  
14  
15

16  
17  
18  
19  
20 **Corresponding author**

21 Jens Erik Jorgensen, Research Unit for General Practice in Aalborg, Department of Clinical  
22 Medicine, Aalborg University, Fyrkildevvej 7, 1. Sal, 9220 Aalborg East, Denmark. Phone:  
23 +4530239585  
24

25  
26 E-mail: [jeja26@gmail.com](mailto:jeja26@gmail.com)  
27  
28  
29  
30

31 Word count: 2837  
32  
33  
34  
35  
36  
37  
38  
39  
40  
41  
42  
43  
44  
45  
46  
47  
48  
49  
50  
51  
52  
53  
54  
55  
56  
57  
58  
59  
60

## ABSTRACT

### Introduction

Low back pain (LBP) is among the health conditions that lead to the most disability worldwide. Guidelines aimed at management of LBP recommend non-invasive and non-pharmacological management, including patient education, advice to stay active, and exercise therapy; however, the guidelines offer no recommendation as to the allowable level of pain during exercise or how specific levels of pain should be reflected in the stage and progression of exercises or activities. The purpose of this review is to study the effect of differentiation of exercise guidance based on level of LBP in patients in primary care.

### Methods and analysis

A systematic search will be performed in PubMed, EMBASE, CINAHL, PsychINFO, PEDRO, Cochrane, and PROSPERO from their inception until September 2017. Published peer-reviewed human experimental and observational studies with quantitative or qualitative designs will be included. Two independent reviewers will identify papers by reviewing titles and abstracts. Papers passing the initial selection will be appraised by two reviewers, based on their full-texts. Furthermore, the reference lists of included studies will be snowballed for identification of other relevant studies. Data will be extracted using a standard extraction sheet by two independent reviewers. Disagreements will be resolved by discussion and consensus with a third reviewer. The methodological quality of studies will be assessed using the Grading of Recommendations, Assessment, Development, and Evaluation (GRADE) risk of bias tool, or the Critical Appraisal Skills Programme (CASP). Results will be reported narratively. Search histories will be documented in Endnote X8 (Clarivate Analytics).

### Ethics and dissemination

Ethical approval for this review was not required as primary data will not be collected. The results will be disseminated through a peer-reviewed international journal and conference presentations.

PROSPERO registration number: 42017074880

**STRENGTHS AND LIMITATIONS OF THIS STUDY**

- To our knowledge, this will be the first review to synthesise evidence for differentiation of advice given by healthcare professionals for exercise treatment of low back pain, based on the pain levels of patients.
- Patients with a broad range of pain intensity levels are treated in primary care; therefore, the findings of this study will be applicable to the heterogeneous group of patients with low back pain seen in clinical practice.
- Patients participating in exercise therapy for low back pain often experience pain; this review could uncover how different levels of pain can be addressed in this context.
- We expect studies included in the review to be heterogeneous in design and to exhibit varying methodological quality, which is a limitation of this review.

## INTRODUCTION

Low back pain (LBP) is one of the most common pain conditions worldwide, with a life-time prevalence of 80%. [1] The prevalence of LBP is highest among women and individuals aged 40–80 years. [1] In the literature, LBP is traditionally defined accordingly to the duration of symptoms, where symptoms lasting less than 12 weeks are defined as acute or subacute LBP, and symptoms lasting more than 12 weeks as chronic LBP. [2, 3] In the majority of cases, the cause of LBP is unknown and only 1–5% of patients have a serious underlying condition, such as cancer, osteoporosis, fractures, systematic inflammatory disease, or other serious condition (red flags) causing the LBP. [4] The first-line management of LBP comprises a non-invasive and non-pharmacological treatment approach, including patient education, advice to stay active, exercise therapy, and manual therapy. [4–7] A Danish study showed that 35% of the adult population have had transient or continuous pain in the lower back in the last year. Furthermore, 21% indicated that they have had disabling LBP during the last 14 days. [8] LBP often develops into a chronic health condition, with an unpredictable pattern of acute episodes, remission, and recurrence. In Denmark with an estimated population of approximately 5.7 million, LBP is a socioeconomic burden to society. [8, 9] The cost of treatment of LBP is estimated at 457 million Euros and the costs of production loss due to short- and long-term LBP amount to an estimated annual 1 billion Euros in Denmark. [10] As LBP is the condition for which there are the most frequent consultations for professional advice in primary care, [11] there is a strong case for increased efforts to improve healthcare for patients with this condition.

Regardless of the duration of LBP, guidelines consistently recommend staying active and exercise therapy. However, guidelines offer no recommendation on how a specific level of pain should be reflected in the level and progression of exercises or activities; consequently, there is a substantial inter-patient variation in clinician recommendations for LBP management. [12] A recent review found that protocols using painful exercises offer a small but significant benefit over pain-free exercises in the short term, with moderate quality of evidence. [13] In the medium and long terms, there is no clear superiority of one treatment over another. [6] Therefore, pain during therapeutic exercise to treat chronic musculoskeletal pain need not be a barrier to exercise treatment participation. [13] Considering patients in two groups, those with and without pain, may be

1  
2  
3  
4  
5 impractical, whereas, considering patients as experiencing a continuum of different pain levels may  
6 better reflect the clinical situation.  
7

8  
9  
10 It is possible that therapeutic exercise can modify the concentration of pain-relieving peptides and  
11 change cerebral neurological activities linked with pain processing in patients with musculoskeletal  
12 pain; however, the level of neuro-physical evidence supporting this relationship is very low.[14]  
13 Accepting pain during exercise can also be an important therapeutic approach for addressing fear-  
14 avoidance, since accepting pain can support physical recovery and diminish psychological fear of  
15 movement, which can worsen the physical condition.[14, 15]  
16  
17  
18  
19  
20

21 An approach of targeting exercise advice based on a pain monitoring model, aligning the fluctuation  
22 of pain levels with the advice given, was effective for patients with Achilles tendinopathy.[16] The  
23 model included six levels of exercise therapy, ranging from “hardly any physical activity” to “hard  
24 or very hard exercise regularly”. Choice of level was based on pain experienced during and after  
25 exercise. According to this model, pain was permitted to be between levels 0 and 5 on a scale from  
26 0 to 10 during exercise, where 0 was no pain and 10 indicated the worst imaginable pain. Pain was  
27 allowed to reach 5 during exercise, but should subside by the next day to the pain level before  
28 exercise. If it did not, the patient was advised to shift to an easier exercise level.[16]  
29  
30  
31  
32  
33  
34  
35

36 There is no evidence that one particular type of exercise therapy for LBP is clearly more effective  
37 than others. Moreover, we were unable to identify any systematic reviews evaluating the effect of  
38 guiding activity based on the level of LBP of patients in primary care. Thus, it remains unclear if  
39 the level of pain should be reflected in the treatment approach for this condition, or whether patients  
40 with different levels of pain will benefit from different exercise approaches.[6, 17–20]  
41  
42  
43  
44

#### 45 **Aim**

46 The aim of this review is to identify studies evaluating the effect of differentiating exercise  
47 guidance for patients with LBP based on the patient’s level of pain in primary care. The primary  
48 outcomes considered in this review will be pain and functional outcome measurements in LBP.  
49  
50  
51  
52  
53  
54  
55  
56  
57  
58  
59  
60

## METHODS AND ANALYSIS

### Study registration

This study is registered in PROSPERO (registration number: 42017074880).

### Study conduct and reporting

This review will be conducted and reported in accordance with the Preferred Reporting Items for Systematic Reviews and Meta-Analyses Protocols (PRISMA-P) 2015 statement.[21]

### Data sources

A pilot search has been conducted with the assistance of a librarian at Aalborg University Library with experience in searching for articles for systematic reviews. The pilot search was performed to qualify our search strategy. We will carry out systematic searches of PubMed, EMBASE, CINAHL, PsychINFO, PEDRO, Cochrane, and PROSPERO. The search strategy will be conducted using MeSH/Emtree headings, combined with free text words. We will include the following MeSH/Emtree/free text terms: 'low back pain', 'rehabilitation', 'physical therapy/medicine', and 'exercise therapy'. This will be followed by snowballing of the reference lists of included studies to identify possible articles that may not have been found in the initial search. Authors of included articles will be contacted if complete articles, or certain data such as data presented only in graphs, are not available. Studies published in English, Danish, Swedish, Norwegian, and German will be considered for inclusion in this review, and there will be no limitation on the time of publication.

### Types of study

The review will include studies evaluating differential guidance for exercise and physical interventions for adults above the age of 18 in primary care, where differentiation was based on the pain levels of patients. Exercise and physical therapy is broadly defined as a regimen, or a plan, of physical activities designed and prescribed for specific therapeutic goals, with the purpose of restoring normal musculoskeletal function or reducing pain caused by disease or injury.[22, 23]

### Data selection

We will include all published peer-reviewed human investigations, including both quantitative and qualitative studies, related to differential guidance on choice of exercise, based on the level of non-



1  
2  
3  
4  
5 specific or nerve root LBP for any duration. We will consider both experimental and observational  
6 quantitative study designs, including randomised controlled trials (RCTs), non-RCTs, quasi-  
7 experimental, before and after studies, and prospective and retrospective cohort studies. We will  
8 include qualitative studies based on interviews and/or workshops.  
9  
10

11  
12  
13 We will exclude studies with a primary focus on pharmacological intervention of LBP, studies  
14 including patients with red flags (cancer, osteoporosis, fractures, systematic inflammatory disease,  
15 or other serious conditions causing the LBP), studies performed outside primary healthcare, studies  
16 with pregnant women, children, and adolescents (< 18 years), reviews, audits, or service reports,  
17 conference posters or abstracts, and studies that were not peer-reviewed.  
18  
19  
20

### 21 22 23 **Selection of studies**

24 Search results will be imported into Mendeley bibliographic software (Elsevier) and duplicates  
25 removed with the help of the “check for duplicates” tool. After removing duplicates, two identical  
26 libraries will be created for the two reviewers to select relevant articles independently.  
27  
28

29  
30 A two-stage process will be undertaken. The initial search will identify papers by review of their  
31 titles and abstracts against the inclusion and exclusion criteria, and will be conducted by two  
32 members of the review team (JEJ and TA). Any disagreement will be resolved by team discussion  
33 and consensus with a third review member (AR). Papers passing the initial selection stage will be  
34 critically appraised by two team members (JEJ and TA) based on their full-texts. Again,  
35 disagreements will be resolved through team discussion and consensus. If further disagreement is  
36 an issue, a third team member will be involved (AR). The reference lists of the included studies will  
37 be snowballed for identification of further relevant papers. The search history will be documented  
38 in Endnote X8 (Clarivate Analytics).  
39  
40  
41  
42  
43  
44  
45

### 46 **Data extraction**

47 We will tabulate characteristics of the included studies, including date of publication, country where  
48 the study was conducted, study design, study aim, setting, condition (acute/subacute or chronic  
49 LBP), intervention(s), number of participants, follow-up periods short-term ( $\leq 12$  weeks), medium-  
50 term ( $>12$  to  $< 52$  weeks), and long-term ( $\geq 52$  weeks), outcomes, author conclusions, and other  
51 (Supplementary file 1). Data from the included studies will be extracted by two independent  
52  
53  
54  
55  
56  
57  
58  
59  
60

1  
2  
3  
4  
5 reviewers (JEJ and TA) using a standardised form to identify the above-mentioned characteristics of  
6 the included studies. Disagreements will be resolved through team discussion and consensus. If  
7 further disagreement is an issue, a third team member will be involved (AR). In the case of missing  
8 methodological information, the corresponding authors of the studies will be contacted.  
9  
10

11  
12 Based on current literature, when possible, outcomes will be rescaled to 0 to 100-point scales. For  
13 example, a VAS score (0–10) of 4.5 (SD 1.2) will be rescaled to 45 (SD 12). For studies to be  
14 appropriate for inclusion in a meta-analysis on exercise therapy for LBP, we consider a 20-point  
15 scale for improvement in pain and a 10-point improvement scale for changes in functional  
16 outcomes to be clinically relevant. Statistical significance will be set at the 5% level. [24–26]  
17  
18  
19  
20  
21

### 22 **Outcome(s)**

23 The primary outcomes considered in this review will be pain and functional outcomes. Other  
24 outcome measures will be regarded as secondary in this review.  
25  
26  
27

28 We will measure the effect of exercise therapy guided by the participants pain levels where it is  
29 incorporated as either a primary or secondary outcome in the included studies. Outcomes may  
30 include, but will not be limited to:  
31  
32  
33  
34

- 35 1. Self-reported methods of pain level assessment, such as the visual analogue scale (VAS) or  
36 numerical pain rating (NPR).
  - 37 2. Low back pain disability scores, such as the Roland-Morris Disability Questionnaire  
38 (RMDQ) or the Oswestry Disability Index (ODI).
  - 39 3. Patient pain-related fear, such as the Pain Anxiety Symptoms Scale (PASS) or the Tampa  
40 Scale of Kinesiophobia (TSK).
  - 41 4. Health related quality of life, such as the SF-36 (as measured by the general health sub-  
42 scale) or EuroQol.
  - 43 5. The employment status.
  - 44 6. Satisfaction with treatment received.
- 45  
46  
47  
48  
49  
50  
51  
52  
53  
54  
55  
56  
57  
58  
59  
60

### **Risk of bias (quality) assessment**

As we expect this review to include studies with both quantitative and qualitative designs, it will be necessary to apply more than one quality appraisal tool to review identified studies across different types of research design.

The quality of final evidence (QoE) in quantitative studies will be determined according to Grades of Recommendation, Assessment, Development and Evaluation (GRADE).[27] In the GRADE system, evaluating the QoE for each outcome of interest begins with determining the study design (e.g. randomised trial or observational study) and then assessing eight additional domains: risk of bias,[28] indirectness of evidence,[29] inconsistency of evidence,[30] imprecision of the estimated effect,[31] likelihood of publication bias,[32] the presence of a dose response effect, magnitude of the estimated effect, and issues around residual confounding.[33] After assessing all the mentioned domains, QoE per outcome is categorised as high, moderate, low, or very low.[34] The overall QoE will be determined by the QoE for each of the critical outcomes, and in most instances, the overall QoE will be based on the lowest QoE for any of the critical outcomes.

### **Appraisal of qualitative studies**

Assessment of qualitative studies will be conducted using the worksheets provided by Critical Appraisal Skills Programme (CASP).[35] The process for assessment of methodological bias in individual studies will be performed in Microsoft Word, and the results will be presented as a risk of bias summary (review of the author's judgments about each risk of bias item for each study included).

### **Strategy for data synthesis**

Qualitative research findings will be presented in a narrative form. Quantitative data will be synthesised based on ranges, descriptive analysis, and interpretations of results. As heterogeneity is expected, we anticipate describing quantitative findings narratively. Meta-analysis will be conducted if a group of studies is sufficiently homogeneous, in terms of the subjects involved, interventions, and outcomes, to provide a meaningful summary.[36] Meta-analyses will then be conducted to summarise data and produce more precise estimates of outcomes for studies considered sufficiently homogeneous to provide a meaningful combined estimate. The choice of

1  
2  
3  
4  
5 whether to conduct a meta-analysis will depend on the number of studies, the completeness of the  
6 reported outcomes, and judgment of the homogeneity among the results. Specifically, if a meta-  
7 analysis is based on a small number of studies, the estimate of between-studies variance may be  
8 substantially in error.[37]  
9

## 12 13 **ETHICS AND DISSEMINATION**

14 Ethical approval for this review was not sought as primary data will not be collected. The results  
15 will be disseminated through a peer-reviewed international journal and conference presentations.  
16  
17

## 18 19 **DISCUSSION**

20  
21 To our knowledge, this will be the first systematic review of the effect of basing exercise advice on  
22 the level of LBP of patients in primary care. A pain monitoring method often used in clinical  
23 practice is that suggested by Silbernagel et al. (2007) and Thomee (1997).[16, 38] This pain  
24 monitoring system documents pain and discomfort during the rehabilitation period, using the visual  
25 analogue scale (VAS) from 0 to 10. Pain reported up to a level of 2 was accepted as “safe”, and  
26 pain levels from 3 to 5 were considered “acceptable”, whereas, pain above 5 was considered to  
27 involve a “high risk”. Pain should have subsided by the next morning. If pain did not subside, the  
28 level of the exercise program was lowered one step. Normal participation in physical activities  
29 during the treatment period using the pain monitoring system was accepted.[16, 38] However, these  
30 studies investigated achilles and patellofemoral pain, and it will be of interest to see if the model is  
31 also useful in LBP.  
32  
33

34  
35 We will probably not be able to make pooled estimations of effects; therefore, the findings will  
36 likely be reported in a narrative form. However, we believe that the findings of this review will be  
37 both relevant and easily implemented in clinical practice. Results from this review will provide  
38 information which can support clinicians in decision-making regarding exercise therapy for patients  
39 with LBP. Furthermore, the review will suggest practical solutions for provision of the most  
40 effective exercise therapy for the treatment of LBP.  
41  
42

43  
44 There is no consensus on the assessment of the validity and reliability of qualitative research;  
45 consequently, critical appraisal instruments differ.[39, 40] The Cochrane Collaboration  
46 recommends specific tools to assess the risk of bias in each included study in an intervention  
47  
48  
49  
50  
51  
52  
53  
54  
55  
56  
57  
58  
59  
60

1  
2  
3  
4  
5 review, a process that is facilitated by the use of appraisal instruments that address the specific  
6 features of the study design, and focusing on the extent to which results of included studies should  
7 be believed. Study quality assessment should focus on the quality of reporting, methodological  
8 rigour, and conceptual depth and bread of studies. Filtering, technical appraisal, and theoretical  
9 appraisal are the three main stages in a critical appraisal assessment.[41] Online appraisal  
10 instruments are available and easily accessible, and clearly define what is meant by each individual  
11 criterion listed.[39, 41] One of these tools is the CASP, originally produced by Dixon-Woods.[35,  
12 42] By identifying common characteristics of qualitative research, Dixon-Woods produced a  
13 checklist of questions for assessing the clarity and appropriateness of the research question; the  
14 description and appropriateness of sampling, data collection, and data analysis; levels of support  
15 and evidence for claims; coherence between data, interpretation, and conclusions; and, finally, level  
16 of contribution of the paper.[42] These criteria led to the development of the 10 questions of the  
17 CASP checklist for qualitative studies.[35] The checklist provides some decision rules and  
18 instructions on how to interpret the criteria and reach a consensus, helping the reviewer to assess the  
19 rigor, credibility, and relevance of a study. Rigor, referring to whether the approach to the study is  
20 thorough and appropriate; credibility, referring to whether the findings are well presented and  
21 meaningful; and relevance, indicating the usefulness of the study's findings to the review.[42]  
22  
23  
24  
25  
26  
27  
28  
29  
30  
31  
32  
33

#### **AUTHOR'S CONTRIBUTIONS**

34  
35 This study was conceptualised by JEJ and AR. JEJ drafted the manuscript. All authors contributed  
36 equally to the design of the study. The search strategy was developed by all authors. JEJ and TA  
37 will contribute to data collection. All the authors will contribute equally to the data analysis and  
38 interpretation for the review. All the authors will critically revise the review. All authors will read  
39 and approve the final manuscript.  
40  
41  
42  
43  
44

#### **FUNDING**

45  
46 This work is supported by The Novo Nordisk Foundation grant number NNF17OC0024422. The  
47 funders have no role in the study design, collection of data, management, analysis, interpretation of  
48 data, writing of the review, or the decision to submit this paper for publication.  
49  
50  
51

#### **COMPETING INTERESTS**

52  
53  
54 None declared.  
55  
56  
57  
58  
59  
60

**OPEN ACCESS**

This is an Open Access article distributed in accordance with the terms of the Creative Commons Attribution (CC BY 4.0) license, which permits others to distribute, remix, adapt, and build upon this work, for commercial use, provided the original work is properly cited. See:

<http://creativecommons.org/licenses/by/4.0/>. ©Article author(s) (or their employer(s) unless otherwise stated in the text of the article) 2017. All rights reserved. No commercial use is permitted unless otherwise expressly granted.

For peer review only

**REFERENCES**

- 1 Hoy D, March L, Brooks P, et al. The global burden of low back pain: estimates from the Global Burden of Disease 2010 study. *Ann Rheum Dis* 2014;73(6):968–74.
- 2 Koes BW, van Tulder M, Lin C-WC, et al. An updated overview of clinical guidelines for the management of non-specific low back pain in primary care. *Eur Spine J* 2010;19(12):2075–94.
- 3 Ladeira CE. Evidence based practice guidelines for management of low back pain: physical therapy implications. *Rev Bras Fisioter* 2011;15(3):190–9.
- 4 NICE (National Institute for Health and Care Excellence). Low back pain and sciatica in over 16s: assessment and management. 2016. Available from: <https://www.nice.org.uk/guidance/ng59>. Accessed August 2017.
- 5 Wong JJ, Coté P, Sutton DA, et al. Clinical practice guidelines for the noninvasive management of low back pain: a systematic review by the Ontario Protocol for Traffic Injury Management (OPTIMA) collaboration. *Eur J Pain* 2017;21(2):201–16.
- 6 Chou R, Deyo R, Friedly J, et al. Nonpharmacologic therapies for low back pain: a systematic review for an American College of Physicians clinical practice guideline. *Ann Intern Med* 2017;166(7):498–506.
- 7 Chou R, Huffman LH; American Pain Society; American College of Physicians. Nonpharmacologic therapies for acute and chronic low back pain: a review of the evidence for an American Pain Society/American College of Physicians clinical practice guideline. *Ann Intern Med* 2007;147:492–504.
- 8 The Danish Health Authority. Statens Institut for Medicinsk Teknologivurdering: Ondt i ryggen: Forekomst, behandling og forebyggelse i et MTV-perspektiv. *Medicinsk Teknologivurdering Serie B* 1999;1(1) Available from <https://www.sst.dk/da/udgivelser/1999/ondt-i-ryggen>. Accessed August 2017.
- 9 The Danish Health Authority. Sundhedsstyrelsen, Center for Evaluering og Medicinsk Teknologivurdering. Evaluering af udviklingen på rygområdet i Danmark 1999-2004 København: Sundhedsstyrelsen, Center for Evaluering og Medicinsk Teknologivurdering, 2006 Available from <https://www.sst.dk/da/udgivelser/2006/evaluering-af-udvikling-paa-rygomraadet-i-danmark-1999-2004>. Accessed August 2017.
- 10 Koch MB, Davidsen M, Juel K. De samfundsmæssige omkostninger ved ryg sygdomme og ryg smerter i Danmark. 2011. Statens Institut for Folkesundhed (SIF), Syddansk Universitet.

1  
2  
3  
4  
5 National Institute of Public Health University of Southern Denmark. Available from  
6 <http://www.sifolkesundhed.dk/Udgivelser/B%C3%B8ger%20og%20rapporter/2011/De%20samfundsm%C3%A6ssige%20omkostninger%20ved%20rygsygdomme%20og%20rygsmerter%20i%20Danmark.aspx>. Accessed August 2017. ISBN: 87-7899-178-1.

11 Della Mora LS, Perruccio A V, Badley EM, et al. Differences among primary care patients with  
12 different mechanical patterns of low back pain: a cross-sectional investigation. *BMJ Open*  
13 2016;6(12):e013060.

14 Knaggs R. Low back pain clinical guidelines: similarities and divergent views across the pond.  
15 *Br J Pain* 2017;11(2):70.

16 Smith BE, Paul Hendrick, Smith TO, et al. Should exercises be painful in the management of  
17 chronic musculoskeletal pain? A systematic review and meta-analysis. *Br J Sport Med* 2017;0:1–  
18 10. [Epub ahead of print].

19 Fuentes C JP, Armijo-Olivo S, Magee DJ, et al. Effects of exercise therapy on endogenous pain-  
20 relieving peptides in musculoskeletal pain. *Clin J Pain* 2011;27(4):365–74.

21 Pincus T, Smeets RJEM, Simmonds MJ, et al. The fear avoidance model disentangled:  
22 improving the clinical utility of the fear avoidance model. *Clin J Pain* 2010;26(9):739–46.

23 Silbernagel KG, Thomee R, Eriksson BI, et al. Continued sports activity, using a pain-  
24 monitoring model, during rehabilitation in patients with Achilles tendinopathy. *Am J Sports Med*  
25 2007;35(6):897–906.

26 Van Middelkoop M, Rubinstein SM, Kuijpers T, et al. A systematic review on the effectiveness  
27 of physical and rehabilitation interventions for chronic non-specific low back pain. *Eur Spine J*  
28 2011;20(1):19–39.

29 Hayden JA, van Tulder MW, Tomlinson G. Systematic review: strategies for using exercise  
30 therapy to improve outcomes in chronic low back pain. *Ann Intern Med* 2015;142(9):776–785.

31 Pillastrini P, Gardenghi I, Bonetti F, et al. An updated overview of clinical guidelines for chronic  
32 low back pain management in primary care. *Jt Bone Spine* 2012;79(2):176–85.

33 Stochkendahl MJ, Kjaer P, Hartvigsen J, et al. National clinical guidelines for non-surgical  
34 treatment of patients with recent onset low back pain or lumbar radiculopathy. *Eur Spine J* 2017;1–  
35 16.



- 1  
2  
3  
4  
5 21 Moher D, Shamseer L, Clarke M, et al. Preferred reporting items for systematic review and  
6 meta-analysis protocols (PRISMA-P) 2015: elaboration and explanation. *Syst Rev* 2015;4(1):1–9.  
7  
8 22 Carlson H, Carlson N. An overview of the management of persistent musculoskeletal pain. *Ther*  
9 *Adv Musculoskelet Dis* 2011;3(2):91–9.  
10  
11 23 Bernstein IA, Malik Q, Carville S, et al. Low back pain and sciatica: summary of NICE  
12 guidance. *BMJ* 2017;6748:i6748.  
13  
14 24 Hayden J, van Tulder MW, Malmivaara A, et al. Exercise therapy for treatment of non-specific  
15 low back pain (review) summary. *Cochrane Database Syst Rev* 2005;20(3):2–4.  
16  
17 25 Hayden JA, Cartwright J, van Tulder MW, et al. Exercise therapy for chronic low back pain  
18 (protocol). *Cochrane Database Syst Rev* 2012;(4):1-20.  
19  
20 26 Hayden JA, Cartwright JL, Riley RD, et al. Exercise therapy for chronic low back pain: protocol  
21 for an individual participant data meta-analysis. *Syst Rev* 2012;1(1):64.  
22  
23 27 Mustafa RA, Santesso N, Brozek J, et al. The GRADE approach is reproducible in assessing the  
24 quality of evidence of quantitative evidence syntheses. *J Clin Epidemiol* 2013;66(7):736–42.  
25  
26 28 Guyatt GH, Oxman AD, Vist G, et al. GRADE guidelines: 4. Rating the quality of evidence -  
27 Study limitations (risk of bias). *J Clin Epidemiol* 2011;64(4):407–15.  
28  
29 29 Guyatt GH, Oxman AD, Kunz R, et al. GRADE guidelines: 8. Rating the quality of evidence -  
30 Indirectness. *J Clin Epidemiol* 2011;64(12):1303–10.  
31  
32 30 Guyatt GH, Oxman AD, Kunz R, et al. GRADE guidelines: 7. Rating the quality of evidence -  
33 Inconsistency. *J Clin Epidemiol* 2011;64(12):1294–302.  
34  
35 31 Guyatt GH, Oxman AD, Kunz R, et al. GRADE guidelines 6. Rating the quality of evidence -  
36 Imprecision. *J Clin Epidemiol* 2011;64(12):1283–93.  
37  
38 32 Guyatt GH, Oxman AD, Montori V, et al. GRADE guidelines: 5. Rating the quality of evidence  
39 - Publication bias. *J Clin Epidemiol* 2011;64(12):1277–82.  
40  
41 33 Guyatt GH, Oxman AD, Sultan S, et al. GRADE guidelines: 9. Rating up the quality of  
42 evidence. *J Clin Epidemiol* 2011;64(12):1311–6.  
43  
44 34. Balshem H, Helfand M, Schünemann HJ, et al. GRADE guidelines: 3. Rating the quality of  
45 evidence. *J Clin Epidemiol* 2011;64(4):401–6.  
46  
47 35 Critical Appraisal Skills Programme (CASP) Checklists. 2017. Available from:  
48 <http://www.casp-uk.net/casp-tools-checklists>. Accessed August 2017.  
49  
50 36 Haidich A. Meta-analysis in medical research. *Hippokratia* 2010;14(Suppl 1):29–37.  
51  
52  
53  
54  
55  
56  
57  
58  
59  
60

1  
2  
3  
4  
5 37 Borenstein M, Hedges LV, Higgins JPT, et al. When does it make sense to perform a meta-  
6 analysis? *Introduction to meta-analysis*. 2009;357–64.

7  
8 38 Thomee R. A comprehensive treatment approach for patellofemoral pain syndrome in young  
9 women. *Phys Ther* 1997;77(12):1690–703.

10  
11 39 Hannes K. Critical appraisal of qualitative research. In: *Supplementary Guidance for Inclusion*  
12 *of Qualitative Research in Cochrane Systematic Reviews of Interventions*. 2011. p. 1–14.

13  
14 40 Leung L. Validity, reliability, and generalizability in qualitative research. *J Fam Med Prim Care*  
15 2015;4(3):324–7.

16  
17 41 Zeng X, Zhang Y, Kwong JSW, et al. The methodological quality assessment tools for  
18 preclinical and clinical studies, systematic review and meta-analysis, and clinical practice guideline:  
19 a systematic review. *J Evid Based Med* 2015;8(1):2–10.

20  
21 42 Dixon-Woods M, Shaw RL, Agarwal S, et al. The problem of appraising qualitative research.  
22 *Qual Saf Health Care* 2004;13(3):223–5.

1  
2  
3  
4  
5  
6  
7  
8  
9  
10  
11  
12  
13  
14  
15  
16  
17  
18  
19  
20  
21  
22  
23  
24  
25  
26  
27  
28  
29  
30  
31  
32  
33  
34  
35  
36  
37  
38  
39  
40  
41  
42  
43  
44  
45  
46  
47

**Extraction sheet for effect of exercise therapy based on the patients` level of low back pain in primary care: a systematic review**

|                                            |  |  |  |  |
|--------------------------------------------|--|--|--|--|
| <b>Author (Year)</b>                       |  |  |  |  |
| <b>Country</b>                             |  |  |  |  |
| <b>Study design</b>                        |  |  |  |  |
| <b>Study aim</b>                           |  |  |  |  |
| <b>Setting</b>                             |  |  |  |  |
| <b>Condition (acute/subacute, chronic)</b> |  |  |  |  |
| <b>Intervention(s)</b>                     |  |  |  |  |
| <b>Number of patients</b>                  |  |  |  |  |
| <b>Follow-up period</b>                    |  |  |  |  |
| <b>Outcomes</b>                            |  |  |  |  |
| <b>Author conclusion</b>                   |  |  |  |  |
| <b>Other</b>                               |  |  |  |  |

For peer review only

|                                            |  |  |  |  |
|--------------------------------------------|--|--|--|--|
| <b>Author (Year)</b>                       |  |  |  |  |
| <b>Country</b>                             |  |  |  |  |
| <b>Study design</b>                        |  |  |  |  |
| <b>Study aim</b>                           |  |  |  |  |
| <b>Setting</b>                             |  |  |  |  |
| <b>Condition (acute/subacute, chronic)</b> |  |  |  |  |
| <b>Intervention(s)</b>                     |  |  |  |  |
| <b>Number of patients</b>                  |  |  |  |  |
| <b>Follow-up period</b>                    |  |  |  |  |
| <b>Outcomes</b>                            |  |  |  |  |
| <b>Author conclusion</b>                   |  |  |  |  |
| <b>Other</b>                               |  |  |  |  |

1  
2  
3  
4  
5  
6  
7  
8  
9  
10  
11  
12  
13  
14  
15  
16  
17  
18  
19  
20  
21  
22  
23  
24  
25  
26  
27  
28  
29  
30  
31  
32  
33  
34  
35  
36  
37  
38  
39  
40  
41  
42  
43  
44  
45  
46  
47

**PRISMA-P (Preferred Reporting Items for Systematic review and Meta-Analysis Protocols) 2015 checklist: recommended items to address in a systematic review protocol\***

| Section and topic                 | Item No | Checklist item                                                                                                                                                                                         |
|-----------------------------------|---------|--------------------------------------------------------------------------------------------------------------------------------------------------------------------------------------------------------|
| <b>ADMINISTRATIVE INFORMATION</b> |         |                                                                                                                                                                                                        |
| Title:                            |         |                                                                                                                                                                                                        |
| Identification                    | 1a      | Identify the report as a protocol of a systematic review<br>Page 2                                                                                                                                     |
| Update                            | 1b      | If the protocol is for an update of a previous systematic review, identify as such<br>N/A                                                                                                              |
| Registration                      | 2       | If registered, provide the name of the registry (such as PROSPERO) and registration number<br>Page 2                                                                                                   |
| Authors:                          |         |                                                                                                                                                                                                        |
| Contact                           | 3a      | Provide name, institutional affiliation, e-mail address of all protocol authors; provide physical mailing address of corresponding author<br>Page 1                                                    |
| Contributions                     | 3b      | Describe contributions of protocol authors and identify the guarantor of the review<br>Page 11                                                                                                         |
| Amendments                        | 4       | If the protocol represents an amendment of a previously completed or published protocol, identify as such and list changes; otherwise, state plan for documenting important protocol amendments<br>N/A |
| Support:                          |         |                                                                                                                                                                                                        |
| Sources                           | 5a      | Indicate sources of financial or other support for the review<br>Page 11                                                                                                                               |
| Sponsor                           | 5b      | Provide name for the review funder and/or sponsor<br>Page 11                                                                                                                                           |
| Role of sponsor or funder         | 5c      | Describe roles of funder(s), sponsor(s), and/or institution(s), if any, in developing the protocol<br>Page 11                                                                                          |
| <b>INTRODUCTION</b>               |         |                                                                                                                                                                                                        |
| Rationale                         | 6       | Describe the rationale for the review in the context of what is already known<br>Pages 4-5                                                                                                             |
| Objectives                        | 7       | Provide an explicit statement of the question(s) the review will address with reference to participants, interventions, comparators, and outcomes (PICO)                                               |

|                                    |     |                                                                                                                                                                                                                                                                |
|------------------------------------|-----|----------------------------------------------------------------------------------------------------------------------------------------------------------------------------------------------------------------------------------------------------------------|
|                                    |     | Page 5                                                                                                                                                                                                                                                         |
| <b>METHODS</b>                     |     |                                                                                                                                                                                                                                                                |
| Eligibility criteria               | 8   | Specify the study characteristics (such as PICO, study design, setting, time frame) and report characteristics (such as years considered, language, publication status) to be used as criteria for eligibility for the review<br>Pages 6-7                     |
| Information sources                | 9   | Describe all intended information sources (such as electronic databases, contact with study authors, trial registers or other grey literature sources) with planned dates of coverage<br>Page 6                                                                |
| Search strategy                    | 10  | Present draft of search strategy to be used for at least one electronic database, including planned limits, such that it could be repeated<br>Page 6                                                                                                           |
| Study records:                     |     |                                                                                                                                                                                                                                                                |
| Data management                    | 11a | Describe the mechanism(s) that will be used to manage records and data throughout the review<br>Page 7                                                                                                                                                         |
| Selection process                  | 11b | State the process that will be used for selecting studies (such as two independent reviewers) through each phase of the review (that is, screening, eligibility and inclusion in meta-analysis)<br>Page 7                                                      |
| Data collection process            | 11c | Describe planned method of extracting data from reports (such as piloting forms, done independently, in duplicate), any processes for obtaining and confirming data from investigators<br>Pages 7-8                                                            |
| Data items                         | 12  | List and define all variables for which data will be sought (such as PICO items, funding sources), any pre-planned data assumptions and simplifications<br>Pages 8, 11                                                                                         |
| Outcomes and prioritization        | 13  | List and define all outcomes for which data will be sought, including prioritization of main and additional outcomes, with rationale<br>Pages 8-9                                                                                                              |
| Risk of bias in individual studies | 14  | Describe anticipated methods for assessing risk of bias of individual studies, including whether this will be done at the outcome or study level, or both; state how this information will be used in data synthesis<br>Page 9                                 |
| Data synthesis                     | 15a | Describe criteria under which study data will be quantitatively synthesised<br>Pages 9-10                                                                                                                                                                      |
|                                    | 15b | If data are appropriate for quantitative synthesis, describe planned summary measures, methods of handling data and methods of combining data from studies, including any planned exploration of consistency (such as $I^2$ , Kendall's $\tau$ )<br>Pages 9-10 |

1  
2  
3  
4  
5  
6  
7  
8  
9  
10  
11  
12  
13  
14  
15  
16  
17  
18  
19  
20  
21  
22  
23  
24  
25  
26  
27  
28  
29  
30  
31  
32  
33  
34  
35  
36  
37  
38  
39  
40  
41  
42  
43  
44  
45  
46  
47

|                                   |     |                                                                                                                                      |
|-----------------------------------|-----|--------------------------------------------------------------------------------------------------------------------------------------|
|                                   | 15c | Describe any proposed additional analyses (such as sensitivity or subgroup analyses, meta-regression)<br>N/A                         |
|                                   | 15d | If quantitative synthesis is not appropriate, describe the type of summary planned<br>Page 9                                         |
| Meta-bias(es)                     | 16  | Specify any planned assessment of meta-bias(es) (such as publication bias across studies, selective reporting within studies)<br>N/A |
| Confidence in cumulative evidence | 17  | Describe how the strength of the body of evidence will be assessed (such as GRADE)<br>Page 9                                         |

**\* It is strongly recommended that this checklist be read in conjunction with the PRISMA-P Explanation and Elaboration (cite when available) for important clarification on the items. Amendments to a review protocol should be tracked and dated. The copyright for PRISMA-P (including checklist) is held by the PRISMA-P Group and is distributed under a Creative Commons Attribution Licence 4.0.**

*From: Shamseer L, Moher D, Clarke M, Ghersi D, Liberati A, Petticrew M, Shekelle P, Stewart L, PRISMA-P Group. Preferred reporting items for systematic review and meta-analysis protocols (PRISMA-P) 2015: elaboration and explanation. BMJ. 2015 Jan 2;349(jan02 1):g7647.*

# BMJ Open

## The effect of differentiating exercise guidance based on patient's level of low back pain in primary care – a mixed methods systematic review protocol

|                                 |                                                                                                                                                                                                                                                                                                                                                               |
|---------------------------------|---------------------------------------------------------------------------------------------------------------------------------------------------------------------------------------------------------------------------------------------------------------------------------------------------------------------------------------------------------------|
| Journal:                        | <i>BMJ Open</i>                                                                                                                                                                                                                                                                                                                                               |
| Manuscript ID                   | bmjopen-2017-019742.R1                                                                                                                                                                                                                                                                                                                                        |
| Article Type:                   | Protocol                                                                                                                                                                                                                                                                                                                                                      |
| Date Submitted by the Author:   | 09-Nov-2017                                                                                                                                                                                                                                                                                                                                                   |
| Complete List of Authors:       | Jorgensen, Jens; Aalborg University, Research Unit for General Practice in Aalborg, Department of Clinical Medicine;<br>Afzali, Tamana; Aalborg University, Research Unit for General Practice in Aalborg, Department of Clinical Medicine<br>Riis, Allan; Aalborg University, Research Unit for General Practice in Aalborg, Department of Clinical Medicine |
| <b>Primary Subject Heading</b>: | General practice / Family practice                                                                                                                                                                                                                                                                                                                            |
| Secondary Subject Heading:      | Rheumatology, Medical education and training                                                                                                                                                                                                                                                                                                                  |
| Keywords:                       | low back pain, exercise therapy, PRIMARY CARE, PAIN MANAGEMENT                                                                                                                                                                                                                                                                                                |
|                                 |                                                                                                                                                                                                                                                                                                                                                               |

SCHOLARONE™  
Manuscripts

Only



1  
2  
3  
4  
5 The effect of differentiating exercise guidance based on patient's level of low back pain in primary  
6 care – a mixed methods systematic review protocol  
7  
8

9  
10 Jens Erik Jorgensen, Tamana Afzali, Allan Riis

11 Research Unit for General Practice in Aalborg, Department of Clinical Medicine, Aalborg  
12 University, Denmark  
13  
14

15  
16  
17  
18 **Corresponding author**

19 Jens Erik Jorgensen, Research Unit for General Practice in Aalborg, Department of Clinical  
20 Medicine, Aalborg University, Fyrkildevvej 7, 1. Sal, 9220 Aalborg East, Denmark. Phone:  
21 +4530239585  
22

23 E-mail: [jeja26@gmail.com](mailto:jeja26@gmail.com)  
24  
25  
26  
27  
28

29 Word count: 2707  
30  
31  
32  
33  
34  
35  
36  
37  
38  
39  
40  
41  
42  
43  
44  
45  
46  
47  
48  
49  
50  
51  
52  
53  
54  
55  
56  
57  
58  
59  
60

## ABSTRACT

### Introduction

Low back pain (LBP) is among the health conditions that lead to the most disability worldwide. Guidelines aimed at management of LBP recommend non-invasive and non-pharmacological management, including patient education, advice to stay active, and exercise therapy; however, the guidelines offer no recommendation as to the allowable level of pain during exercise or how specific levels of pain should be reflected in the stage and progression of exercises or activities. The purpose of this review is to study the effect of differentiation of exercise guidance based on level of LBP in patients in primary care.

### Methods and analysis

A systematic search will be performed in PubMed, EMBASE, CINAHL, PsychINFO, PEDRO, Cochrane, and PROSPERO from their inception until September 2017. Published peer-reviewed human experimental and observational studies with quantitative or qualitative designs will be included. Two independent reviewers will identify papers by reviewing titles and abstracts. Papers passing the initial selection will be appraised by two reviewers, based on their full-texts. Furthermore, the reference lists of included studies will be snowballed for identification of other relevant studies. Data will be extracted using a standard extraction sheet by two independent reviewers. Disagreements will be resolved by discussion and consensus with a third reviewer. The methodological quality of studies will be assessed using the Grading of Recommendations, Assessment, Development, and Evaluation (GRADE) risk of bias tool, or the Critical Appraisal Skills Programme (CASP). Results will be reported narratively. Search histories will be documented in Endnote X8 (Clarivate Analytics).

### Ethics and dissemination

Ethical approval for this review was not required as primary data will not be collected. The results will be disseminated through a peer-reviewed international journal and conference presentations.

PROSPERO registration number: CRD42017074880

## STRENGTHS AND LIMITATIONS OF THIS STUDY

- To our knowledge, this will be the first review to synthesise evidence for differentiation of advice given by healthcare professionals for exercise treatment of low back pain, based on the pain levels of patients.
- Patients with a broad range of pain intensity levels are treated in primary care; therefore, the findings of this study will be applicable to the heterogeneous group of patients with low back pain seen in clinical practice.
- Patients participating in exercise therapy for low back pain often experience pain; this review could uncover how different levels of pain can be addressed in this context.
- We expect studies included in the review to be heterogeneous in design and to exhibit varying methodological quality, which is a limitation of this review.

## INTRODUCTION

Low back pain (LBP) is one of the most common pain conditions worldwide, with a life-time prevalence of 80%. [1] The prevalence of LBP is highest among women and individuals aged 40–80 years. [1] In the literature, LBP is traditionally defined accordingly to the duration of symptoms, where symptoms lasting less than 12 weeks are defined as acute or subacute LBP, and symptoms lasting more than 12 weeks as chronic LBP. [2, 3] In the majority of cases, the cause of LBP is unknown and only 1–5% of patients have a serious underlying condition, such as cancer, osteoporosis, fractures, systematic inflammatory disease, or other serious condition (red flags) causing the LBP. [4] The first-line management of LBP comprises a non-invasive and non-pharmacological treatment approach, including patient education, advice to stay active, exercise therapy, and manual therapy. [4–7] A Danish study showed that 35% of the adult population have had transient or continuous pain in the lower back in the last year. Furthermore, 21% indicated that they have had disabling LBP during the last 14 days. [8] LBP often develops into a chronic health condition, with an unpredictable pattern of acute episodes, remission, and recurrence. In Denmark with an estimated population of approximately 5.7 million, LBP is a socioeconomic burden to society. [8, 9] The cost of treatment of LBP is estimated at 457 million Euros and the costs of production loss due to short- and long-term LBP amount to an estimated annual 1 billion Euros in Denmark. [10] As LBP is the condition for which there are the most frequent consultations for professional advice in primary care, [11] there is a strong case for increased efforts to improve healthcare for patients with this condition.

Regardless of the duration of LBP, guidelines consistently recommend staying active and exercise therapy. However, guidelines offer no recommendation on how a specific level of pain should be reflected in the level and progression of exercises or activities; consequently, there is a substantial inter-patient variation in clinician recommendations for LBP management. [12] A recent review found that protocols using painful exercises offer a small but significant benefit over pain-free exercises in the short term, with moderate quality of evidence. [13] In the medium and long terms, there is no clear superiority of one treatment over another. [13] Therefore, pain during therapeutic exercise to treat chronic musculoskeletal pain need not be a barrier to exercise treatment participation. [13] Considering patients in two groups, those with and without pain, may be

1  
2  
3  
4  
5 impractical, whereas, considering patients as experiencing a continuum of different pain levels may  
6 better reflect the clinical situation.  
7

8  
9  
10 It is possible that therapeutic exercise can modify the concentration of pain-relieving peptides and  
11 change cerebral neurological activities linked with pain processing in patients with musculoskeletal  
12 pain; however, the level of neuro-physical evidence supporting this relationship is very low.[14]  
13 Accepting pain during exercise can also be an important therapeutic approach for addressing fear-  
14 avoidance, since accepting pain can support physical recovery and diminish psychological fear of  
15 movement, which can worsen the physical condition.[14, 15]  
16  
17  
18  
19  
20

21 An approach of targeting exercise advice based on a pain monitoring model, aligning the fluctuation  
22 of pain levels with the advice given, was effective for patients with Achilles tendinopathy.[16] The  
23 model included six levels of exercise therapy, ranging from “hardly any physical activity” to “hard  
24 or very hard exercise regularly”. Choice of level was based on pain experienced during and after  
25 exercise. According to this model, pain was permitted to be between levels 0 and 5 on a scale from  
26 0 to 10 during exercise, where 0 was no pain and 10 indicated the worst imaginable pain. Pain was  
27 allowed to reach 5 during exercise, but should subside by the next day to the pain level before  
28 exercise. If it did not, the patient was advised to shift to an easier exercise level.[16]  
29  
30  
31  
32  
33  
34  
35

36 There is no evidence that one particular type of exercise therapy for LBP is clearly more effective  
37 than others.[17] Moreover, we were unable to identify any systematic reviews evaluating the effect  
38 of guiding activity based on the level of LBP of patients in primary care. Thus, it remains unclear if  
39 the level of pain should be reflected in the treatment approach for this condition, or whether patients  
40 with different levels of pain will benefit from different exercise approaches.[6, 17–20]  
41  
42  
43  
44

#### 45 **Aim**

46 The aim of this review is to identify studies evaluating the effect of differentiating exercise  
47 guidance for patients with LBP based on the patient’s level of pain in primary care. The primary  
48 outcomes considered in this review will be pain and functional outcome measurements in LBP.  
49  
50  
51

52  
53 The review will address the following question:  
54  
55  
56  
57  
58  
59  
60

1  
2  
3  
4  
5 What is the effect and potential cost-effectiveness of exercises for patients with LBP based on their  
6 specific levels of pain, in primary healthcare?  
7  
8  
9

## 10 **METHODS AND ANALYSIS**

### 11 **Study registration**

12  
13  
14 This study is registered in PROSPERO (registration number: CRD42017074880).  
15  
16

### 17 **Study conduct and reporting**

18  
19 This review will be conducted and reported in accordance with the Preferred Reporting Items for  
20 Systematic Reviews and Meta-Analyses Protocols (PRISMA-P) 2015 statement.[21]  
21  
22

### 23 **Data sources**

24  
25 A pilot search has been conducted with the assistance of a librarian at Aalborg University Library  
26 with experience in searching for articles for systematic reviews. The pilot search was performed to  
27 qualify our search strategy. We will carry out systematic searches of PubMed [Supplementary file  
28 1], EMBASE, CINAHL, PsychINFO, PEDRO, Cochrane, and PROSPERO from their inception  
29 until September 2017. The search strategy will be conducted using MeSH/Emtree headings,  
30 combined with free text words. We will include the following MeSH/Emtree/free text terms: ‘low  
31 back pain’, ‘rehabilitation’, ‘physical therapy/medicine’, and ‘exercise therapy’. This will be  
32 followed by snowballing of the reference lists of included studies to identify possible articles that  
33 may not have been found in the initial search. Authors of included articles will be contacted if  
34 complete articles, or certain data such as data presented only in graphs, are not available. Studies  
35 published in English, Danish, Swedish, Norwegian, and German will be considered for inclusion in  
36 this review, and there will be no limitation on the time of publication.  
37  
38  
39  
40  
41  
42  
43  
44  
45

### 46 **Types of study**

47  
48 The review will include studies evaluating differential guidance for exercise and physical  
49 interventions for adults above the age of 18 in primary care, where differentiation was based on the  
50 pain levels of patients. Exercise and physical therapy is broadly defined as a regimen, or a plan, of  
51 physical activities designed and prescribed for specific therapeutic goals, with the purpose of  
52 restoring normal musculoskeletal function or reducing pain caused by disease or injury.[22, 23]  
53  
54  
55  
56  
57  
58  
59  
60

### Data selection

We will include all published peer-reviewed human investigations, including both quantitative and qualitative studies, related to differential guidance on choice of exercise, based on the level of pain. We will consider both experimental and observational quantitative study designs, including randomised controlled trials (RCTs), non-RCTs, quasi-experimental, before and after studies, and prospective and retrospective cohort studies, and economic evaluations. We will include qualitative studies based on interviews and/or workshops. Studies of adults ( $\geq 18$  years) treated in primary healthcare settings with non-specific LBP or nerve root LBP (including sciatica and/or radiculopathy) for any duration will be included.

We will exclude studies with a primary focus on pharmacological intervention of LBP, studies including patients with red flags (cancer, osteoporosis, fractures, systematic inflammatory disease, or other serious conditions causing the LBP), studies performed outside primary healthcare, studies with pregnant women, children, and adolescents ( $< 18$  years), reviews, audits, or service reports, conference posters or abstracts, and studies that were not peer-reviewed.

### Selection of studies

Search results will be imported into Mendeley bibliographic software (Elsevier) and duplicates removed with the help of the “check for duplicates” tool. After removing duplicates, two identical libraries will be created for the two reviewers to select relevant articles independently.

A two-stage process will be undertaken. The initial search will identify papers by review of their titles and abstracts against the inclusion and exclusion criteria, and will be conducted by two members of the review team (JEJ and TA). Any disagreement will be resolved by team discussion and consensus with a third review member (AR). Papers passing the initial selection stage will be critically appraised by two team members (JEJ and TA) based on their full-texts for final eligibility. Again, disagreements will be resolved through team discussion and consensus. If further disagreement is an issue, a third team member will be involved (AR). The reference lists of the included studies will be snowballed for identification of further relevant papers. The search history will be documented in Endnote X8 (Clarivate Analytics).

### Data extraction

We will tabulate characteristics of the included studies, including date of publication, country where the study was conducted, study design, study aim, setting, condition (acute/subacute or chronic LBP), intervention(s), number of participants, follow-up periods short-term ( $\leq 12$  weeks), medium-term ( $>12$  to  $< 52$  weeks), and long-term ( $\geq 52$  weeks), outcomes, author conclusions, and other [Supplementary file 2]. Data from the included studies will be extracted by two independent reviewers (JEJ and TA) using a standardised form to identify the above-mentioned characteristics of the included studies. Disagreements will be resolved through team discussion and consensus. If further disagreement is an issue, a third team member will be involved (AR). In the case of missing methodological information, the corresponding authors of the studies will be contacted. Based on current literature, when possible, outcomes will be rescaled to 0 to 100-point scales. For example, a VAS score (0–10) of 4.5 (SD 1.2) will be rescaled to 45 (SD 12). For studies to be appropriate for inclusion in a meta-analysis on exercise therapy for LBP, we consider a 20-point scale for improvement in pain and a 10-point improvement scale for changes in functional outcomes to be clinically relevant. Statistical significance will be set at the 5% level. [24–26]

### Outcome(s)

The primary outcomes will be the commonly applied domains - pain and function. [27-28] Other outcome domains will be regarded as secondary in this review.

We will measure the effect of exercise therapy guided by the participants pain levels where it is incorporated as either a primary or secondary outcome in the included studies. Outcomes may include, but will not be limited to:

1. Self-reported methods of pain level assessment, such as the visual analogue scale (VAS) or numerical pain rating (NPR).
2. Low back pain disability scores, such as the Roland-Morris Disability Questionnaire (RMDQ) or the Oswestry Disability Index (ODI).
3. Patient pain-related fear, such as the Pain Anxiety Symptoms Scale (PASS) or the Tampa Scale of Kinesiophobia (TSK).



4. Health related quality of life, such as the SF-36 (as measured by the general health sub-scale) or EuroQol.
5. The employment status.
6. Satisfaction with treatment received.
7. Fear avoidance due to LBP
8. Pain self-efficacy
9. Self-esteem because of LBP
10. Self-management of LBP

### **Risk of bias (quality) assessment**

As we expect this review to include studies with both quantitative and qualitative designs, it will be necessary to apply more than one quality appraisal tool to review identified studies across different types of research design.

The quality of final evidence (QoE) in quantitative studies will be determined according to Grades of Recommendation, Assessment, Development and Evaluation (GRADE).[29] In the GRADE system, evaluating the QoE for each outcome of interest begins with determining the study design (e.g. randomised trial or observational study) and then assessing eight additional domains: risk of bias,[30] indirectness of evidence,[31] inconsistency of evidence,[32] imprecision of the estimated effect,[33] likelihood of publication bias,[34] the presence of a dose response effect, magnitude of the estimated effect, and issues around residual confounding.[35] After assessing all the mentioned domains, QoE per outcome is categorised as high, moderate, low, or very low.[36] The overall QoE will be determined by the QoE for each of the critical outcomes, and in most instances, the overall QoE will be based on the lowest QoE for any of the critical outcomes.

### **Appraisal of qualitative studies**

Assessment of qualitative studies will be conducted using the worksheets provided by Critical Appraisal Skills Programme (CASP).[37] CASP provides a checklist of questions for assessing the clarity and appropriateness of the research question; the description and appropriateness of sampling, data collection, and data analysis; levels of support and evidence for claims; coherence

1  
2  
3  
4  
5 between data, interpretation, and conclusions; and, finally, level of contribution of the paper.[37]  
6

7 The process for assessment of methodological bias in individual studies will be performed in  
8 Microsoft Word, and the results will be presented as a risk of bias summary (review of the author's  
9 judgments about each risk of bias item for each study included).  
10  
11

### 12 13 **Strategy for data synthesis**

14  
15 Qualitative research findings will be presented in a narrative form. Quantitative data will be  
16 synthesised based on ranges, descriptive analysis, and interpretations of results. As heterogeneity is  
17 expected, we anticipate describing quantitative findings narratively. Meta-analysis will be  
18 conducted if a group of studies is sufficiently homogeneous, in terms of the subjects involved,  
19 interventions, and outcomes, to provide a meaningful summary.[38] Meta-analyses will then be  
20 conducted to summarise data and produce more precise estimates of outcomes for studies  
21 considered sufficiently homogeneous to provide a meaningful combined estimate. The choice of  
22 whether to conduct a meta-analysis will depend on the number of studies, the completeness of the  
23 reported outcomes, and judgment of the homogeneity among the results. Specifically, if a meta-  
24 analysis is based on a small number of studies, the estimate of between-studies variance may be  
25 substantially in error.[39]  
26  
27  
28  
29  
30  
31  
32  
33  
34

### 35 **ETHICS AND DISSEMINATION**

36 Ethical approval for this review was not sought as primary data will not be collected. The results  
37 will be disseminated through a peer-reviewed international journal and conference presentations.  
38  
39  
40

### 41 **DISCUSSION**

42  
43 To our knowledge, this will be the first systematic review of the effect of basing exercise advice on  
44 the level of LBP of patients in primary care. A pain monitoring method often used in clinical  
45 practice is that suggested by Silbernagel et al. (2007) and Thomee (1997).[16, 40] This pain  
46 monitoring system documents pain and discomfort during the rehabilitation period, using the visual  
47 analogue scale (VAS) from 0 to 10. Pain reported up to a level of 2 was accepted as "safe", and  
48 pain levels from 3 to 5 were considered "acceptable", whereas, pain above 5 was considered to  
49 involve a "high risk". Pain should have subsided by the next morning. If pain did not subside, the  
50  
51  
52  
53  
54  
55  
56  
57  
58  
59  
60

1  
2  
3  
4  
5 level of the exercise program was lowered one step. Normal participation in physical activities  
6 during the treatment period using the pain monitoring system was accepted.[16, 40] However, these  
7 studies investigated achilles and patellofemoral pain, and it will be of interest to see if the model is  
8 also useful in LBP.  
9  
10

11  
12  
13 We will probably not be able to make pooled estimations of effects; therefore, the findings will  
14 likely be reported in a narrative form. However, we believe that the findings of this review will be  
15 both relevant and easily implemented in clinical practice. Results from this review will provide  
16 information which can support clinicians in decision-making regarding exercise therapy for patients  
17 with LBP. Furthermore, the review will suggest practical solutions for provision of the most  
18 effective exercise therapy for the treatment of LBP.  
19  
20

21  
22  
23 There is no consensus on the assessment of the validity and reliability of qualitative research;  
24 consequently, critical appraisal instruments differ.[41, 42] The Cochrane Collaboration  
25 recommends specific tools to assess the risk of bias in each included study in an intervention  
26 review, a process that is facilitated by the use of appraisal instruments that address the specific  
27 features of the study design, and focusing on the extent to which results of included studies should  
28 be believed. Study quality assessment should focus on the quality of reporting, methodological  
29 rigour, and conceptual depth and bread of studies. Filtering, technical appraisal, and theoretical  
30 appraisal are the three main stages in a critical appraisal assessment.[43] Online appraisal  
31 instruments are available and easily accessible, and clearly define what is meant by each individual  
32 criterion listed.[41, 43] One of these tools is the CASP, consisting of 10 questions for qualitative  
33 studies.[37, 44] The checklist provides some decision rules and instructions on how to interpret the  
34 criteria and reach a consensus, helping the reviewer to assess the rigor, credibility, and relevance of  
35 a study. Rigor, referring to whether the approach to the study is thorough and appropriate;  
36 credibility, referring to whether the findings are well presented and meaningful; and relevance,  
37 indicating the usefulness of the study's findings to the review.[44]  
38  
39  
40  
41  
42  
43  
44  
45  
46  
47

#### 48 **AUTHOR'S CONTRIBUTIONS**

49  
50 This study was conceptualised by JEJ and AR. JEJ drafted the manuscript. All authors contributed  
51 equally to the design of the study. The search strategy was developed by all authors. JEJ and TA  
52 will contribute to data collection. All the authors will contribute equally to the data analysis and  
53  
54  
55  
56  
57  
58  
59  
60

1  
2  
3  
4  
5 interpretation for the review. All the authors will critically revise the review. All authors will read  
6 and approve the final manuscript.  
7

### 8 9 **FUNDING**

10 This work is supported by The Novo Nordisk Foundation grant number NNF17OC0024422. The  
11 funders have no role in the study design, collection of data, management, analysis, interpretation of  
12 data, writing of the review, or the decision to submit this paper for publication.  
13  
14  
15

### 16 17 **COMPETING INTERESTS**

18 None declared.  
19  
20

### 21 22 **OPEN ACCESS**

23 This is an Open Access article distributed in accordance with the terms of the Creative Commons  
24 Attribution (CC BY 4.0) license, which permits others to distribute, remix, adapt, and build upon  
25 this work, for commercial use, provided the original work is properly cited. See:  
26 <http://creativecommons.org/licenses/by/4.0/>. ©Article author(s) (or their employer(s) unless  
27 otherwise stated in the text of the article) 2017. All rights reserved. No commercial use is permitted  
28 unless otherwise expressly granted.  
29  
30  
31  
32  
33  
34  
35  
36  
37  
38  
39  
40  
41  
42  
43  
44  
45  
46  
47  
48  
49  
50  
51  
52  
53  
54  
55  
56  
57  
58  
59  
60

**REFERENCES**

- 1 Hoy D, March L, Brooks P, et al. The global burden of low back pain: estimates from the Global Burden of Disease 2010 study. *Ann Rheum Dis* 2014;73(6):968–74.
- 2 Koes BW, van Tulder M, Lin C-WC, et al. An updated overview of clinical guidelines for the management of non-specific low back pain in primary care. *Eur Spine J* 2010;19(12):2075–94.
- 3 Ladeira CE. Evidence based practice guidelines for management of low back pain: physical therapy implications. *Rev Bras Fisioter* 2011;15(3):190–9.
- 4 NICE (National Institute for Health and Care Excellence). Low back pain and sciatica in over 16s: assessment and management. 2016. Available from: <https://www.nice.org.uk/guidance/ng59>. Accessed August 2017.
- 5 Wong JJ, Coté P, Sutton DA, et al. Clinical practice guidelines for the noninvasive management of low back pain: a systematic review by the Ontario Protocol for Traffic Injury Management (OPTIMa) collaboration. *Eur J Pain* 2017;21(2):201–16.
- 6 Chou R, Deyo R, Friedly J, et al. Nonpharmacologic therapies for low back pain: a systematic review for an American College of Physicians clinical practice guideline. *Ann Intern Med* 2017;166(7):498–506.
- 7 Chou R, Huffman LH; American Pain Society; American College of Physicians. Nonpharmacologic therapies for acute and chronic low back pain: a review of the evidence for an American Pain Society/American College of Physicians clinical practice guideline. *Ann Intern Med* 2007;147:492–504.
- 8 The Danish Health Authority. Statens Institut for Medicinsk Teknologivurdering: Ondt i ryggen: Forekomst, behandling og forebyggelse i et MTV-perspektiv. *Medicinsk Teknologivurdering Serie B* 1999;1(1) Available from <https://www.sst.dk/da/udgivelser/1999/ondt-i-ryggen>. Accessed August 2017.
- 9 The Danish Health Authority. Sundhedsstyrelsen, Center for Evaluering og Medicinsk Teknologivurdering. Evaluering af udviklingen på rygområdet i Danmark 1999-2004 København: Sundhedsstyrelsen, Center for Evaluering og Medicinsk Teknologivurdering, 2006 Available from <https://www.sst.dk/da/udgivelser/2006/evaluering-af-udvikling-paa-rygomraadet-i-danmark-1999-2004>. Accessed August 2017.
- 10 Koch MB, Davidsen M, Juel K. De samfundsmæssige omkostninger ved ryg sygdomme og ryg smerter i Danmark. 2011. Statens Institut for Folkesundhed (SIF), Syddansk Universitet.

1  
2  
3  
4  
5 National Institute of Public Health University of Southern Denmark. Available from  
6 <http://www.sifolkesundhed.dk/Udgivelser/B%C3%B8ger%20og%20rapporter/2011/De%20samfundsm%C3%A6ssige%20omkostninger%20ved%20rygsygdomme%20og%20rygsmerter%20i%20Danmark.aspx>. Accessed August 2017. ISBN: 87-7899-178-1.

11 Della Mora LS, Perruccio A V, Badley EM, et al. Differences among primary care patients with  
12 different mechanical patterns of low back pain: a cross-sectional investigation. *BMJ Open*  
13 2016;6(12):e013060.

14 Knaggs R. Low back pain clinical guidelines: similarities and divergent views across the pond.  
15 *Br J Pain* 2017;11(2):70.

16 Smith BE, Paul Hendrick, Smith TO, et al. Should exercises be painful in the management of  
17 chronic musculoskeletal pain? A systematic review and meta-analysis. *Br J Sport Med* 2017;0:1–  
18 10. [Epub ahead of print].

19 Fuentes C JP, Armijo-Olivo S, Magee DJ, et al. Effects of exercise therapy on endogenous pain-  
20 relieving peptides in musculoskeletal pain. *Clin J Pain* 2011;27(4):365–74.

21 Pincus T, Smeets RJEM, Simmonds MJ, et al. The fear avoidance model disentangled:  
22 improving the clinical utility of the fear avoidance model. *Clin J Pain* 2010;26(9):739–46.

23 Silbernagel KG, Thomee R, Eriksson BI, et al. Continued sports activity, using a pain-  
24 monitoring model, during rehabilitation in patients with Achilles tendinopathy. *Am J Sports Med*  
25 2007;35(6):897–906.

26 Van Middelkoop M, Rubinstein SM, Kuijpers T, et al. A systematic review on the effectiveness  
27 of physical and rehabilitation interventions for chronic non-specific low back pain. *Eur Spine J*  
28 2011;20(1):19–39.

29 Hayden JA, van Tulder MW, Tomlinson G. Systematic review: strategies for using exercise  
30 therapy to improve outcomes in chronic low back pain. *Ann Intern Med* 2015;142(9):776–785.

31 Pillastrini P, Gardenghi I, Bonetti F, et al. An updated overview of clinical guidelines for chronic  
32 low back pain management in primary care. *Jt Bone Spine* 2012;79(2):176–85.

33 Stochkendahl MJ, Kjaer P, Hartvigsen J, et al. National clinical guidelines for non-surgical  
34 treatment of patients with recent onset low back pain or lumbar radiculopathy. *Eur Spine J* 2017;1–  
35 16.

- 1  
2  
3  
4  
5 21 Moher D, Shamseer L, Clarke M, et al. Preferred reporting items for systematic review and  
6 meta-analysis protocols (PRISMA-P) 2015: elaboration and explanation. *Syst Rev* 2015;4(1):1–9.  
7  
8 22 Carlson H, Carlson N. An overview of the management of persistent musculoskeletal pain. *Ther*  
9 *Adv Musculoskelet Dis* 2011;3(2):91–9.  
10  
11 23 Bernstein IA, Malik Q, Carville S, et al. Low back pain and sciatica: summary of NICE  
12 guidance. *BMJ* 2017;6748:i6748.  
13  
14 24 Hayden J, van Tulder MW, Malmivaara A, et al. Exercise therapy for treatment of non-specific  
15 low back pain (review) summary. *Cochrane Database Syst Rev* 2005;20(3):2–4.  
16  
17 25 Hayden JA, Cartwright J, van Tulder MW, et al. Exercise therapy for chronic low back pain  
18 (protocol). *Cochrane Database Syst Rev* 2012;(4):1-20.  
19  
20 26 Hayden JA, Cartwright JL, Riley RD, et al. Exercise therapy for chronic low back pain: protocol  
21 for an individual participant data meta-analysis. *Syst Rev* 2012;1(1):64.  
22  
23 27 Froud R, Patel S, Rajendran D, Bright P, et al. A Systematic Review of Outcome Measures Use,  
24 Analytical Approaches, Reporting Methods, and Publication Volume by Year in Low Back Pain  
25 Trials Published between 1980 and 2012: Respite, adspice, et prospice. *PLoS One*. 2016 Oct  
26 24;11(10):e0164573.  
27  
28 28 Bombardier C. Outcome Assessments in the Evaluation of Treatment of Spinal Disorders:  
29 Summary and General Recommendations. *Spine*.2000 Dec 15;25(24):3100-3.  
30  
31 29 Mustafa RA, Santesso N, Brozek J, et al. The GRADE approach is reproducible in assessing the  
32 quality of evidence of quantitative evidence syntheses. *J Clin Epidemiol* 2013;66(7):736–42.  
33  
34 30 Guyatt GH, Oxman AD, Vist G, et al. GRADE guidelines: 4. Rating the quality of evidence -  
35 Study limitations (risk of bias). *J Clin Epidemiol* 2011;64(4):407–15.  
36  
37 31 Guyatt GH, Oxman AD, Kunz R, et al. GRADE guidelines: 8. Rating the quality of evidence -  
38 Indirectness. *J Clin Epidemiol* 2011;64(12):1303–10.  
39  
40 32 Guyatt GH, Oxman AD, Kunz R, et al. GRADE guidelines: 7. Rating the quality of evidence -  
41 Inconsistency. *J Clin Epidemiol* 2011;64(12):1294–302.  
42  
43 33 Guyatt GH, Oxman AD, Kunz R, et al. GRADE guidelines 6. Rating the quality of evidence -  
44 Imprecision. *J Clin Epidemiol* 2011;64(12):1283–93.  
45  
46 34 Guyatt GH, Oxman AD, Montori V, et al. GRADE guidelines: 5. Rating the quality of evidence  
47 - Publication bias. *J Clin Epidemiol* 2011;64(12):1277–82.  
48  
49  
50  
51  
52  
53  
54  
55  
56  
57  
58  
59  
60

- 1  
2  
3  
4  
5 35 Guyatt GH, Oxman AD, Sultan S, et al. GRADE guidelines: 9. Rating up the quality of  
6 evidence. *J Clin Epidemiol* 2011;64(12):1311–6.  
7  
8 36. Balshem H, Helfand M, Schünemann HJ, et al. GRADE guidelines: 3. Rating the quality of  
9 evidence. *J Clin Epidemiol* 2011;64(4):401–6.  
10  
11 37 Critical Appraisal Skills Programme (CASP) Checklists. 2017. Available from:  
12 <http://www.casp-uk.net/casp-tools-checklists>. Accessed August 2017.  
13  
14 38 Haidich A. Meta-analysis in medical research. *Hippokratia* 2010;14(Suppl 1):29–37.  
15  
16 39 Borenstein M, Hedges LV, Higgins JPT, et al. When does it make sense to perform a meta-  
17 analysis? *Introduction to meta-analysis*. 2009;357–64.  
18  
19 40 Thomee R. A comprehensive treatment approach for patellofemoral pain syndrome in young  
20 women. *Phys Ther* 1997;77(12):1690–703.  
21  
22 41 Hannes K. Critical appraisal of qualitative research. In: *Supplementary Guidance for Inclusion*  
23 *of Qualitative Research in Cochrane Systematic Reviews of Interventions*. 2011. p. 1–14.  
24  
25 42 Leung L. Validity, reliability, and generalizability in qualitative research. *J Fam Med Prim Care*  
26 2015;4(3):324–7.  
27  
28 43 Zeng X, Zhang Y, Kwong JSW, et al. The methodological quality assessment tools for  
29 preclinical and clinical studies, systematic review and meta-analysis, and clinical practice guideline:  
30 a systematic review. *J Evid Based Med* 2015;8(1):2–10.  
31  
32 44 Dixon-Woods M, Shaw RL, Agarwal S, et al. The problem of appraising qualitative research.  
33 *Qual Saf Health Care* 2004;13(3):223–5.  
34  
35  
36  
37  
38  
39  
40  
41  
42  
43  
44  
45  
46  
47  
48  
49  
50  
51  
52  
53  
54  
55  
56  
57  
58  
59  
60



1  
2  
3  
4 Search Strategy PubMed. Supplementary file 1  
5  
6  
7  
8

9 Sciatica [MeSH Terms])

10 OR Low back pain [MeSH Terms]))

11 OR ((low back pain)

12 OR sciatica)))

13 AND rehabilitation

14 OR physical medicine [MeSH Terms]

15 OR physical therapy [MeSH Terms]

16 OR (physical therapy)

17 OR physical medicine

18 OR rehabilitation [MeSH Terms]

19 AND Humans[Mesh]

20 AND Clinical Study[ptyp]

21 OR Clinical Trial[ptyp]

22 OR Comparative Study[ptyp]

23 OR Controlled Clinical Trial[ptyp]

24 OR Interview[ptyp]

25 OR Multicenter Study[ptyp]

26 OR Observational Study[ptyp]

27 OR Practice Guideline[ptyp]

28 AND Humans[Mesh]

**Extraction sheet for effect of exercise therapy based on the patients` level of low back pain in primary care: a systematic review**

|                                            |  |  |  |  |
|--------------------------------------------|--|--|--|--|
| <b>Author (Year)</b>                       |  |  |  |  |
| <b>Country</b>                             |  |  |  |  |
| <b>Study design</b>                        |  |  |  |  |
| <b>Study aim</b>                           |  |  |  |  |
| <b>Setting</b>                             |  |  |  |  |
| <b>Condition (acute/subacute, chronic)</b> |  |  |  |  |
| <b>Intervention(s)</b>                     |  |  |  |  |
| <b>Number of patients</b>                  |  |  |  |  |
| <b>Follow-up period</b>                    |  |  |  |  |
| <b>Outcomes</b>                            |  |  |  |  |
| <b>Author conclusion</b>                   |  |  |  |  |
| <b>Other</b>                               |  |  |  |  |

|                                            |  |  |  |  |
|--------------------------------------------|--|--|--|--|
| <b>Author (Year)</b>                       |  |  |  |  |
| <b>Country</b>                             |  |  |  |  |
| <b>Study design</b>                        |  |  |  |  |
| <b>Study aim</b>                           |  |  |  |  |
| <b>Setting</b>                             |  |  |  |  |
| <b>Condition (acute/subacute, chronic)</b> |  |  |  |  |
| <b>Intervention(s)</b>                     |  |  |  |  |
| <b>Number of patients</b>                  |  |  |  |  |
| <b>Follow-up period</b>                    |  |  |  |  |
| <b>Outcomes</b>                            |  |  |  |  |
| <b>Author conclusion</b>                   |  |  |  |  |
| <b>Other</b>                               |  |  |  |  |

For peer review only

1  
2  
3  
4  
5  
6  
7  
8  
9  
10  
11  
12  
13  
14  
15  
16  
17  
18  
19  
20  
21  
22  
23  
24  
25  
26  
27  
28  
29  
30  
31  
32  
33  
34  
35  
36  
37  
38  
39  
40  
41  
42  
43  
44  
45  
46

**PRISMA-P (Preferred Reporting Items for Systematic review and Meta-Analysis Protocols) 2015 checklist: recommended items to address in a systematic review protocol\***

| Section and topic                 | Item No | Checklist item                                                                                                                                                                                         |
|-----------------------------------|---------|--------------------------------------------------------------------------------------------------------------------------------------------------------------------------------------------------------|
| <b>ADMINISTRATIVE INFORMATION</b> |         |                                                                                                                                                                                                        |
| Title:                            |         |                                                                                                                                                                                                        |
| Identification                    | 1a      | Identify the report as a protocol of a systematic review<br>Page 2                                                                                                                                     |
| Update                            | 1b      | If the protocol is for an update of a previous systematic review, identify as such<br>N/A                                                                                                              |
| Registration                      | 2       | If registered, provide the name of the registry (such as PROSPERO) and registration number<br>Page 2                                                                                                   |
| Authors:                          |         |                                                                                                                                                                                                        |
| Contact                           | 3a      | Provide name, institutional affiliation, e-mail address of all protocol authors; provide physical mailing address of corresponding author<br>Page 1                                                    |
| Contributions                     | 3b      | Describe contributions of protocol authors and identify the guarantor of the review<br>Page 11                                                                                                         |
| Amendments                        | 4       | If the protocol represents an amendment of a previously completed or published protocol, identify as such and list changes; otherwise, state plan for documenting important protocol amendments<br>N/A |
| Support:                          |         |                                                                                                                                                                                                        |
| Sources                           | 5a      | Indicate sources of financial or other support for the review<br>Page 11                                                                                                                               |
| Sponsor                           | 5b      | Provide name for the review funder and/or sponsor<br>Page 11                                                                                                                                           |
| Role of sponsor or funder         | 5c      | Describe roles of funder(s), sponsor(s), and/or institution(s), if any, in developing the protocol<br>Page 11                                                                                          |
| <b>INTRODUCTION</b>               |         |                                                                                                                                                                                                        |
| Rationale                         | 6       | Describe the rationale for the review in the context of what is already known<br>Pages 4-5                                                                                                             |
| Objectives                        | 7       | Provide an explicit statement of the question(s) the review will address with reference to participants, interventions, comparators, and outcomes (PICO)                                               |

---

 Page 5
 

---

**METHODS**


---

|                                    |     |                                                                                                                                                                                                                                                                |
|------------------------------------|-----|----------------------------------------------------------------------------------------------------------------------------------------------------------------------------------------------------------------------------------------------------------------|
| Eligibility criteria               | 8   | Specify the study characteristics (such as PICO, study design, setting, time frame) and report characteristics (such as years considered, language, publication status) to be used as criteria for eligibility for the review<br>Pages 6-7                     |
| Information sources                | 9   | Describe all intended information sources (such as electronic databases, contact with study authors, trial registers or other grey literature sources) with planned dates of coverage<br>Page 6                                                                |
| Search strategy                    | 10  | Present draft of search strategy to be used for at least one electronic database, including planned limits, such that it could be repeated<br>Suppl file 1                                                                                                     |
| Study records:                     |     |                                                                                                                                                                                                                                                                |
| Data management                    | 11a | Describe the mechanism(s) that will be used to manage records and data throughout the review<br>Page 7                                                                                                                                                         |
| Selection process                  | 11b | State the process that will be used for selecting studies (such as two independent reviewers) through each phase of the review (that is, screening, eligibility and inclusion in meta-analysis)<br>Page 7                                                      |
| Data collection process            | 11c | Describe planned method of extracting data from reports (such as piloting forms, done independently, in duplicate), any processes for obtaining and confirming data from investigators<br>Pages 7-8                                                            |
| Data items                         | 12  | List and define all variables for which data will be sought (such as PICO items, funding sources), any pre-planned data assumptions and simplifications<br>Pages 8, 11                                                                                         |
| Outcomes and prioritization        | 13  | List and define all outcomes for which data will be sought, including prioritization of main and additional outcomes, with rationale<br>Pages 8-9                                                                                                              |
| Risk of bias in individual studies | 14  | Describe anticipated methods for assessing risk of bias of individual studies, including whether this will be done at the outcome or study level, or both; state how this information will be used in data synthesis<br>Page 9                                 |
| Data synthesis                     | 15a | Describe criteria under which study data will be quantitatively synthesised<br>Pages 9-10                                                                                                                                                                      |
|                                    | 15b | If data are appropriate for quantitative synthesis, describe planned summary measures, methods of handling data and methods of combining data from studies, including any planned exploration of consistency (such as $I^2$ , Kendall's $\tau$ )<br>Pages 9-10 |

|                                   |     |                                                                                                                                      |
|-----------------------------------|-----|--------------------------------------------------------------------------------------------------------------------------------------|
|                                   | 15c | Describe any proposed additional analyses (such as sensitivity or subgroup analyses, meta-regression)<br>N/A                         |
|                                   | 15d | If quantitative synthesis is not appropriate, describe the type of summary planned<br>Page 9                                         |
| Meta-bias(es)                     | 16  | Specify any planned assessment of meta-bias(es) (such as publication bias across studies, selective reporting within studies)<br>N/A |
| Confidence in cumulative evidence | 17  | Describe how the strength of the body of evidence will be assessed (such as GRADE)<br>Page 9                                         |

**\* It is strongly recommended that this checklist be read in conjunction with the PRISMA-P Explanation and Elaboration (cite when available) for important clarification on the items. Amendments to a review protocol should be tracked and dated. The copyright for PRISMA-P (including checklist) is held by the PRISMA-P Group and is distributed under a Creative Commons Attribution Licence 4.0.**

*From: Shamseer L, Moher D, Clarke M, Ghersi D, Liberati A, Petticrew M, Shekelle P, Stewart L, PRISMA-P Group. Preferred reporting items for systematic review and meta-analysis protocols (PRISMA-P) 2015: elaboration and explanation. BMJ. 2015 Jan 2;349(jan02 1):g7647.*
