# Supplementary material for: Effect of differentiating exercise guidance based on a patient’s level of low back pain in primary care: a mixed-methods systematic review protocol
Source: PubMed Central journal article supplement — BMJ Open. 2018 Jan 23;8(1):e019742. doi: 10.1136/bmjopen-2017-019742 (PMC5988063; doi:10.1136/bmjopen-2017-019742), 2018-01-23
Supplement: bmjopen-2017-019742supp001.pdf [file bmjopen-2017-019742supp001.pdf]

Search Strategy PubMed. Supplementary file 1

Sciatica [MeSH Terms])

OR Low back pain [MeSH Terms]))

OR ((low back pain)

OR sciatica)))

AND rehabilitation

OR physical medicine [MeSH Terms]

OR physical therapy [MeSH Terms]

OR (physical therapy)

OR physical medicine

OR rehabilitation [MeSH Terms]

AND Humans[Mesh]

AND Clinical Study[ptyp]

OR Clinical Trial[ptyp]

OR Comparative Study[ptyp]

OR Controlled Clinical Trial[ptyp]

OR Interview[ptyp]

OR Multicenter Study[ptyp]

OR Observational Study[ptyp]

OR Practice Guideline[ptyp]

AND Humans[Mesh]
