# Supplementary material for: Effect of differentiating exercise guidance based on a patient’s level of low back pain in primary care: a mixed-methods systematic review protocol
Source: PubMed Central journal article supplement — BMJ Open. 2018 Jan 23;8(1):e019742. doi: 10.1136/bmjopen-2017-019742 (PMC5988063; doi:10.1136/bmjopen-2017-019742), 2018-01-23
Supplement: bmjopen-2017-019742supp002.pdf [file bmjopen-2017-019742supp002.pdf]

**Extraction sheet for effect of exercise therapy based on the patients` level of low back pain in primary care: a systematic review**

---

|                                            |  |  |  |  |
|--------------------------------------------|--|--|--|--|
| <b>Author (Year)</b>                       |  |  |  |  |
| <b>Country</b>                             |  |  |  |  |
| <b>Study design</b>                        |  |  |  |  |
| <b>Study aim</b>                           |  |  |  |  |
| <b>Setting</b>                             |  |  |  |  |
| <b>Condition (acute/subacute, chronic)</b> |  |  |  |  |
| <b>Intervention(s)</b>                     |  |  |  |  |
| <b>Number of patients</b>                  |  |  |  |  |
| <b>Follow-up period</b>                    |  |  |  |  |
| <b>Outcomes</b>                            |  |  |  |  |
| <b>Author conclusion</b>                   |  |  |  |  |
| <b>Other</b>                               |  |  |  |  |

|                                            |  |  |  |  |
|--------------------------------------------|--|--|--|--|
| <b>Author (Year)</b>                       |  |  |  |  |
| <b>Country</b>                             |  |  |  |  |
| <b>Study design</b>                        |  |  |  |  |
| <b>Study aim</b>                           |  |  |  |  |
| <b>Setting</b>                             |  |  |  |  |
| <b>Condition (acute/subacute, chronic)</b> |  |  |  |  |
| <b>Intervention(s)</b>                     |  |  |  |  |
| <b>Number of patients</b>                  |  |  |  |  |
| <b>Follow-up period</b>                    |  |  |  |  |
| <b>Outcomes</b>                            |  |  |  |  |
| <b>Author conclusion</b>                   |  |  |  |  |
| <b>Other</b>                               |  |  |  |  |
